1 **Spontaneous thought and microstate activity modulation by**  
2 **social imitation**

3

4

5 Miralena I. Tomescu<sup>1,2</sup>, Claudiu C. Papasteri<sup>1,2</sup>, Alexandra Sofonea<sup>1</sup>,  
6 Romina Boldasu<sup>1</sup>, Valeria Kebets<sup>3</sup>, Catalina Poalelungi<sup>1,4</sup>,  
7 Ioana R. Podina<sup>1,2</sup>, Catalin I. Nedelcea<sup>1,2</sup>, Alexandru I. Berceanu<sup>1</sup>,  
8 and Ioana Carcea<sup>\*1,5</sup>

9

- 10 1. CINETic Center, National University of Theatre and Film “I.L. Caragiale” Bucharest,  
11 Bucharest, Romania
- 12 2. Faculty of Psychology and Educational Sciences, Department of Psychology, University  
13 of Bucharest, Bucharest, Romania
- 14 3. Department of Electrical and Computer Engineering, National University of Singapore,  
15 Singapore
- 16 4. Faculty of Biology, University of Bucharest, Bucharest, Romania
- 17 5. Department of Pharmacology, Physiology and Neuroscience; Rutgers Brain Health  
18 Institute; Rutgers, The State University of New Jersey

19

20

21 \*Corresponding author: [ioana.carcea@rutgers.edu](mailto:ioana.carcea@rutgers.edu)

22

23

24

25

26 **Abstract**

27 Social imitation increases well-being and closeness by mechanisms that remain poorly understood.  
28 We propose that imitation impacts behavioural states in part by modulating post-imitation mind-  
29 wandering. The human mind wanders spontaneously and frequently, revisiting the past and  
30 imagining the future of self and of others. External and internal factors can influence wandering  
31 spontaneous thoughts, whose content predicts subsequent emotional states. In 43 young subjects,  
32 we find that imitating the arm movements of an actor alters the dynamics and the content of  
33 subsequent resting-state spontaneous thoughts. Imitation-sensitive features of spontaneous  
34 thoughts correlate with both behavioural states and salivary oxytocin levels. EEG microstate  
35 analysis reveals that global patterns of correlated neuronal activity predict imitation-induced  
36 changes in spontaneous thoughts. Thus, imitation can modulate ongoing activity in specific neural  
37 networks to change spontaneous thought patterns as a function of oxytocin levels, and to ultimately  
38 orchestrate behavioural states.

39

40

41

42

43

44

45

46

47

48

49

## 50 **Introduction**

51 Humans spend a significant fraction of their waking time defaulting to ‘mind-wandering’, an  
52 unconstrained succession of mental states that generate spontaneous thoughts<sup>1-4</sup>. The content of  
53 spontaneous thought varies widely within and between individuals, and can be characterized with  
54 respect to its dynamics (more or less fragmented), affect (negative, neutral, positive), temporal  
55 orientation (remembering or planning), social orientation (self or others), mental modality (visual  
56 or verbal), and association with physiological states (sleepiness, stress, etc)<sup>3, 5-8</sup>. Many of these  
57 dimensions can be captured in experimental settings by validated retrospective self-reported  
58 questionnaires, like the Amsterdam Resting-State Questionnaire (ARSQ)<sup>9</sup>.

59 Spontaneous thoughts correlate with explicit affective state. Negative mood and spontaneous  
60 thoughts interact circularly, as sad spontaneous thoughts tend to be both preceded and succeeded  
61 by sad or anxious moods<sup>7,10</sup>. Socio-temporal features of spontaneous thoughts can also predict  
62 subsequent mood, where past- and other-oriented thoughts predict negative affect, but future- and  
63 self-oriented thoughts predict improved mood<sup>7</sup>. Other studies, however, found that self-related  
64 content of spontaneous thoughts correlates with sad mood and with depressive symptoms<sup>11</sup>.

65 Spontaneous thoughts can serve important roles in mental well-being, including in generating  
66 personal goals<sup>12-14</sup>, in memory consolidation<sup>15,16</sup>, and in fostering creativity<sup>14, 16-18</sup>. In other words,  
67 spontaneous thought profiles can improve behavioural states and serve as internal tools for  
68 cognitive and emotional well-being. Could these tools be leveraged in behavioural interventions?  
69 This possibility is bolstered by the documented impact of contextual factors on spontaneous  
70 thoughts<sup>8</sup>. However, much more remains to be understood about the nature of contexts capable of  
71 changing mind-wandering, and about the mechanisms by which they achieve such changes.

72 Spontaneous thoughts likely arise from task-independent ongoing brain activity<sup>19,20</sup>. Functional  
73 imaging implicates several brain networks in spontaneous thought. Primarily, the default mode  
74 network (DMN), which is active during states of rest, and decreases as a consequence of task  
75 demands<sup>20-22</sup> is closely linked to the generation of spontaneous thoughts<sup>23</sup>. In addition to the DMN,  
76 mind-wandering also engages salience and executive control networks<sup>21,24,25</sup>. These networks are  
77 believed to impose automatic and deliberate constraints on mind-wandering, or in other words they  
78 track the ‘wandering path’ from one spontaneous thought to another<sup>4</sup>.

79 The logistics of functional imaging (lying still in a loud scanner) might bias the nature of  
80 spontaneous thoughts. A more naturalistic approach to probing the neural substrates of mind-  
81 wandering is to perform scalp electroencephalographic (EEG) recordings, and characterize  
82 activity-correlated networks using microstate analysis. This analysis identifies transiently (60-120  
83 ms) quasi-stable global patterns of scalp potential topographies that are highly reproducible within  
84 and across subjects<sup>26,27</sup>. Between four and seven such states have been identified so far, and have  
85 been linked to fMRI resting-state networks<sup>26,28,29,30,31</sup>. Several studies using simultaneous EEG and  
86 fMRI, or direct EEG source localization methodology, support the notion that microstates A and  
87 B are associated with primary sensory brain regions like visual, auditory/language cortices, while  
88 C, D, and E microstates associate with core regions of the posterior DMN, attention/cognitive  
89 control, and salience resting-state networks, respectively<sup>26,31</sup>. Potential roles of these microstates  
90 in visual imagery, cognitive control and planning have been described and also disputed<sup>26</sup>.  
91 However, a distinct pattern of modulations between the posterior DMN C state and attention D  
92 state might reinforce their functional meaning. Relaxed, meditative, and hypnotic states entrain  
93 longer and more frequent posterior DMN C states, and slower attention D temporal dynamics<sup>26,32-</sup>  
94 <sup>35</sup>. Microstate analysis could deepen the understanding of neural substrates for spontaneous  
95 thoughts. It could also identify mechanisms by which contextual factors change the pattern and  
96 spontaneous thoughts and their effects on behaviour.

97 Social factors represent a major source of context variation in humans, however little is known  
98 about the relationship between social contexts and spontaneous thoughts. In the current study, we  
99 hypothesize that social contexts can change subsequent resting-state spontaneous thoughts, and  
100 microstate activity patterns. To test this, we used a dyadic social imitation task, where subjects  
101 follow the arm movements of an actor. We previously showed that this form of social imitation  
102 decreases momentary stress, increases well-being and social closeness<sup>36</sup>. Several mechanisms for  
103 these behavioural changes have been proposed, including rewarding effects, and perception-action  
104 matching<sup>36,37</sup>. Hormonal substrates have also been implicated, particularly increased levels of  
105 oxytocin<sup>36,38</sup>. We reasoned that in addition to the above mechanisms, imitation could modify  
106 behavioural states indirectly, by changing ongoing brain activity and the pattern of spontaneous  
107 thoughts. We used a combination of behavioural, biochemical and physiological measures to show  
108 that spontaneous thought patterns and ongoing activity of neural networks are sensitive to social  
109 imitation. Our findings indicate a potential mechanism by which social imitation, which is already

110 used in theatre as an exercise that decreases stage fright and increases closeness between actors,  
111 could be therapeutic in the general population.

112

## 113 **Results**

114 To determine if brief dyadic social imitation (SI) might alter spontaneous thoughts and ongoing  
115 activity of neural network in imitators, we probed five-minute resting-state episodes before (PRE)  
116 and after (POST) the task (**Fig. 1a**). The SI task consisted of a three-minute interaction where the  
117 subject followed the arm movements of an actor, as previously described<sup>36</sup>. For the control, non-  
118 social condition (CTRL), subjects were asked to depict with their arm movements the shape of  
119 geometrical figures displayed on a computer screen (**Fig. 1b**). Within each subject, experimental  
120 and control conditions were completed on separate days, and in random order.

121

### 122 **Modulation of resting-state spontaneous thoughts by social imitation**

123 To quantify the changes in spontaneous-thoughts during resting-state episodes, we evaluated  
124 intrinsic mentation using a standardized test, the ARSQ 2.0 questionnaire<sup>9</sup> that allowed us to  
125 construct a repertoire of the individual subjective mind-wandering experience and their  
126 modulations by tasks. In order to investigate if and how SI modulates spontaneous thoughts, we  
127 performed three-way repeated measures ANOVA with the ARSQ factors, by time (PRE vs POST)  
128 and condition (SI vs CTRL). At the group level, as expected from the structure of the test, we  
129 found a main effect of ARSQ factors ( $F(3, 378)=38.2, p<0.00001, 0.47 \eta_p^2$ ). We also found a  
130 significant main effect of time ( $F(1,42)=4.38, p=0.042, 0.09 \eta_p^2, PRE=9.30\pm 0.17, POST=9.05$   
131  $\pm 0.18, N=43$ ), and a significant three way interaction between time, ARSQ factors and conditions  
132 ( $F(9,378)=2.03, p=0.03, 0.04 \eta_p^2$ ). After the SI task, subjects reported less fragmented thoughts,  
133 fewer thoughts about themselves and their bodies, and felt less tired (**Fig. 1c**). Post-hoc tests  
134 revealed significant changes induced by SI in four different factor categories: *discontinuity of mind*  
135 ( $PRE= 10.41\pm 2.53, POST=9.20\pm 3.09, p=0.005, N=43$ ), *self-related thoughts* ( $PRE=10.58\pm 2.91,$   
136  $POST=9.39\pm 3.4, p=0.0006$ ), *sleepiness* ( $PRE=7.0\pm 3.28, POST=6.09\pm 2.9, p=0.036$ ) and *somatic*  
137 *awareness* ( $PRE=9.67\pm 3.34, POST=8.58\pm 3.38, p=0.012$ ) (**Fig. 1c**). No significant changes were

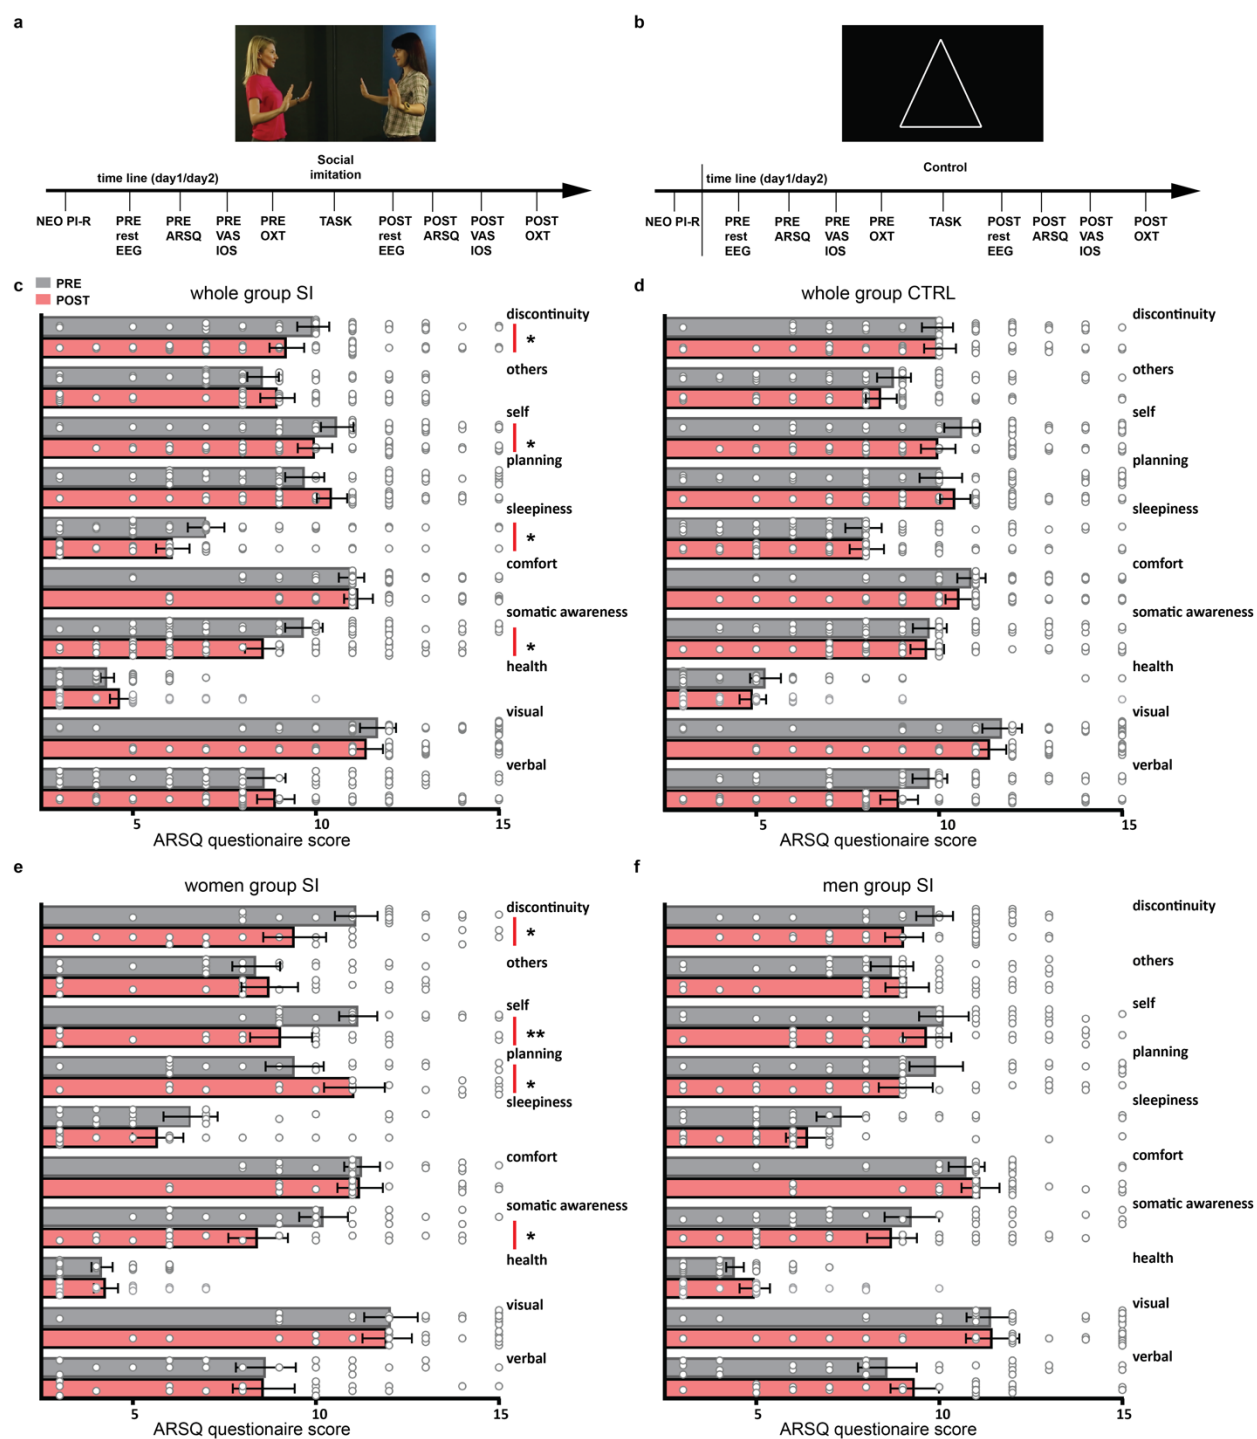

138

**Figure 1. SI changes spontaneous thoughts.** (a) Experimental design, SI task. (b) Design of control task. (c) Resting-state ARSQ scores before (PRE, gray) and after (POST, red) the SI task. (d) Resting-state ARSQ scores before and after CTRL task. (e) Effects of SI on ARSQ scores in women. (f) Effects of SI on ARSQ scores in men. Errors are SEM, \* $p < 0.05$ , \*\* $p < 0.001$ .

139 detected after the CTRL conditions (**Fig. 1d**). This indicates that imitating another person, but not  
140 an inanimate screen, can lead to changes in subsequent spontaneous thought dynamics (less  
141 fragmented), content (less about self), and association with physiological states (less tired).

142 When we separated the group by gender, we found that women account for most of the SI-induced  
143 changes in spontaneous thoughts. There was a significant main effect of time PRE-POST  
144 ( $F(1,18)=4.7$ ,  $p=0.043$ ,  $0.20 \eta_p^2$ ,  $PRE=9.45\pm 0.28$ ,  $POST=9.11 \pm 0.29$ ), and a significant three way  
145 interaction between time, ARSQ factors and conditions ( $F(9,162)=2.83$ ,  $p=0.03$ ,  $0.04 \eta_p^2$ ).  
146 Following SI, women reported having significantly less fragmented thoughts (*discontinuity*,  $PRE=$   
147  $11.1\pm 2.53$ ,  $POST=9.42\pm 3.7$ ,  $p=0.004$ ), thinking less about themselves (*self*,  $PRE=11.1\pm 2.26$   
148  $POST=9.05\pm 3.6$ ,  $p=0.0003$ ) and their bodies (*somatic awareness*,  $PRE=10.21.67\pm 2.89$ ,  
149  $POST=8.42\pm 3.54$ ,  $p=0.002$ ) (**Fig. 1e**). Moreover, women reported a significant increase of the  
150 *planning* factor ( $PRE=9.42\pm 3.45$ ,  $POST=11.06$ ,  $p=0.005$ ) (**Fig. 1e**). On the contrary, in men we  
151 found neither a main effect of time ( $F(1,22)=0.6$ ,  $p=0.44$ ) nor a significant interaction between  
152 time, ARSQ factors and conditions ( $F(9,198)=1.48$ ,  $p=1.56$ ) (**Fig. 1f**).

153

#### 154 **Associations between spontaneous thoughts and behavioural states**

155 We previously showed that SI but not the CTRL task can increase well-being and social closeness,  
156 whereas both SI and CTRL conditions lead to decreased self-reported stress<sup>36</sup>. To determine if  
157 there is an association between these momentary self-reported behavioural states and spontaneous  
158 thoughts, we performed rank correlation analyses between behavioural and ARSQ scores across  
159 all conditions (**Fig. 2**). In women we found a significant positive correlation between *discontinuity*  
160 *of mind* and perceived stress level (Gamma  $r=0.36$ ,  $p=0.033$ ), that was not significant either at the  
161 group level or in men (**Fig. 2a**). We also found a positive association between the level of perceived  
162 stress and *self*-oriented thoughts (Gamma  $r=0.35$ ,  $p=0.001$ , **Fig. 2b**) and thoughts about *health*  
163 (Gamma  $r=0.29$ ,  $p=0.007$ , **Fig. 2d**). Stress was negatively associated with thoughts about *comfort*  
164 (Gamma  $r= -0.31$ ,  $p=0.004$ , **Fig. 2d**). The reversed pattern of correlation was found for wellbeing  
165 (*health*: Gamma  $r= -0.33$ ,  $p= 0.002$ ; *comfort*: Gamma  $r=0.56$ ,  $p<0.0001$ , **Fig 2c,d**). Thoughts about  
166 future *plans* were positively associated with both closeness (Gamma  $r=0.24$ ,  $p=0.02$ ) and well-  
167 being (Gamma  $r=0.21$ ,  $p= 0.04$ ) (**Fig. 2d**). These findings indicate a relationship between

168 behavioural states and the pattern of spontaneous thoughts, both of which change after SI,  
 169 particularly in women.

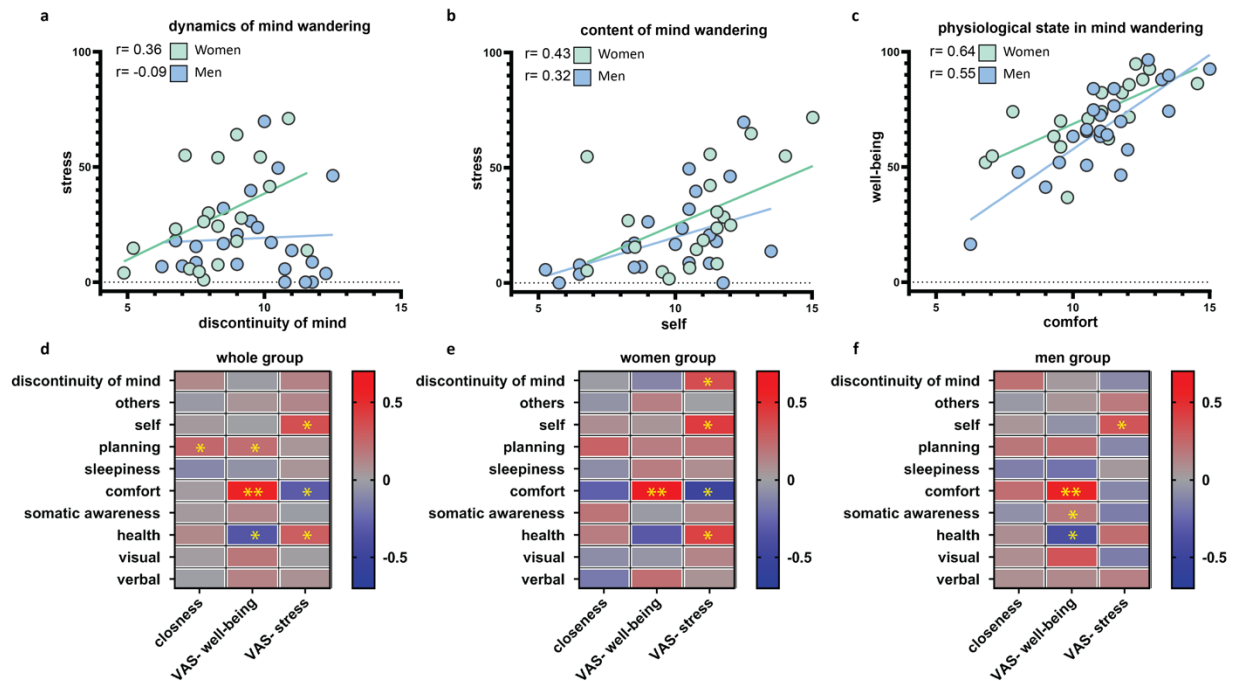

**Figure 2. The pattern of spontaneous thoughts associates with subjective behavioral states.** (a) Dynamics of spontaneous thought positively associate with self-reported stress levels. (b) Self-centered thought content positively correlates with stress. (c) Perceived states of ‘comfort’ during mind-wandering positively correlate with self-reported well-being. (d) Summary data of correlations (r values) between ARSQ scores and self-reported behavioral state measures for the entire group. (e) Summary of correlations for women. (f) Summary of correlations for men, \*p<0.05, \*\*p<0.001.

170

171

## 172 Associations between spontaneous thoughts and salivary oxytocin

173 Imitation has been linked to increased levels of salivary oxytocin<sup>36,38</sup>. We previously showed that  
 174 this increase is only partially related to the outcome of the SI on self-reported behavioural states<sup>36</sup>.  
 175 In order to find how spontaneous thoughts across conditions relate to salivary oxytocin levels, we  
 176 calculated correlations that showed several significant negative associations of salivary OXT  
 177 dynamics with *discontinuity of mind* (Gamma, r=-0.25, p= 0.029, **Fig. 3a**), with thoughts about



178 future *planning* (Gamma,  $r=-0.25$ ,  $p=0.03$ , **Fig. 3b**) and, only in the men group, with *comfort*  
 179 (Gamma,  $r=-0.25$ ,  $p=0.03$ ) (**Fig. 3c**). Therefore, while increased salivary oxytocin could represent  
 180 a potential mechanism for changing the dynamics of spontaneous thoughts (i.e., less fragmented  
 181 thinking), it does not appear to affect their content or their association with physiological states.

182

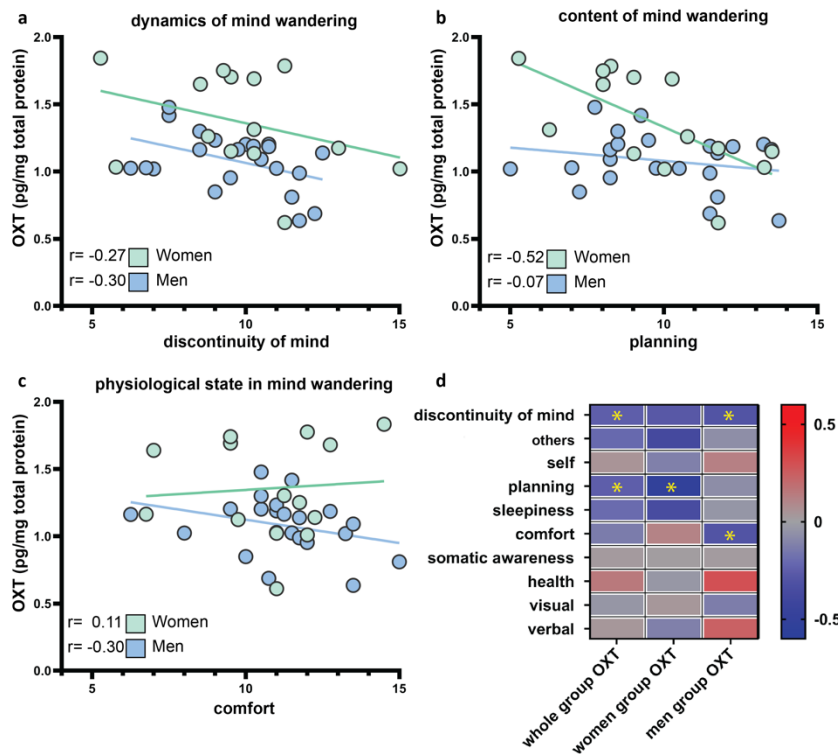

**Figure 3. Spontaneous thought patterns associate with salivary OXT levels.**

(a) Dynamics of mind-wandering negatively correlate with salivary OXT.

(b) Thoughts about 'planning' negatively correlate with OXT in women.

(c) States of 'comfort' negatively correlate with OXT.

(d) Summary data of correlations between ARSQ scores and salivary OXT,  $*p < 0.05$ .

183

184

### 185 Neural correlates for SI-induced changes in resting-state activity

186 To investigate the neural substrate for SI-induced changes in mentation, we recorded EEG activity  
 187 during resting-state. Using a set of seven different independent criteria (described in **Methods**),  
 188 we determined that five microstates can optimally describe group topographical variability. Across  
 189 all conditions (PRE, POST before and after the SI/CTRL) and individuals (N=43), summing more  
 190 than 800 individual resting-state dominant topographies, the cluster analysis robustly identified A,

191 B, C, D and E prototypical microstates that explained 81.9 % of variance (**Fig. 4a**). We then  
192 analysed SI-induced changes in the duration and occurrence of these EEG microstates.

193

#### 194 **SI modulates the intrinsic temporal dynamics of microstates**

195 To identify how the SI task might modulate intrinsic patterns of resting networks dynamics, we  
196 performed repeated-measures three-way ANOVA analysis on the *duration (ms)* and *occurrence*  
197 (*Hz*) of microstates, by time (PRE vs POST) and by condition (SI vs CTRL). Separate paired  
198 Wilcoxon tests were performed to identify the specific task modulation for each microstate.

199 In the ANOVA analysis for microstate *duration* we found a main effect of time (N=43,  
200 PRE=83.8±5.50, POST=85.45±5.55, F(1,42)=10.7, p=0.002, 0.20  $\eta_p^2$ ) and a main effect of  
201 microstates (A=75.6±6.71, B=88.5±16.06, C=103.71±18.71, D=76.19±9.84, E=79.16±9.84,  
202 F(1,42)=36.53, p<0.00001, 0.46  $\eta_p^2$ , **Fig. 4b**). After the SI task, two classes of microstates showed  
203 increased *duration*, microstate A (PRE=74.5±6.5, POST=76.5±8.1, p=0.006) and microstate C  
204 (PRE=102.6, ±20.3, POST=105±18.7, p=0.04, **Fig. 4b**). We also observed a significant increase  
205 in microstate E *duration* after the CTRL task (PRE=77.3±11.3, POST=80±13.3, p=0.006, **Fig. 4c**).  
206 Thus, as hypothesized, the SI task modulated a different pattern of network dynamics than the  
207 CTRL task.

208 Regarding *occurrence*, we observe neither a significant ANOVA time effect nor a significant time,  
209 condition and microstate interaction. However, we found a main effect of microstates  
210 (A=1.38±0.41, B=1.95±0.48, C=2.37±0.35, D=1.46±0.69, E=1.49±0.48 F(4,168)=30.7,  
211 p<0.00001, 0.42  $\eta_p^2$ ), and a significant time by microstate interaction (A- PRE=1.44±0.37 vs  
212 POST=1.49±0.39, B-PRE=1.95±0.47 vs POST=1.91±0.43, C – PRE=2.33±0.35 vs  
213 POST=2.35±0.27, D-PRE=1.53±0.62 vs POST=1.45±0.67, E –PRE-1.49±0.49 vs  
214 POST=1.52±0.5, F(4,168)=2.47, p=0.04, 0.05 $\eta_p^2$ ). Post-hoc tests showed that SI specifically  
215 decreases the occurrence of microstate D (PRE=1.51 ±0.67, POST=1.41±0.72, p=0.012, **Fig. 4b**).

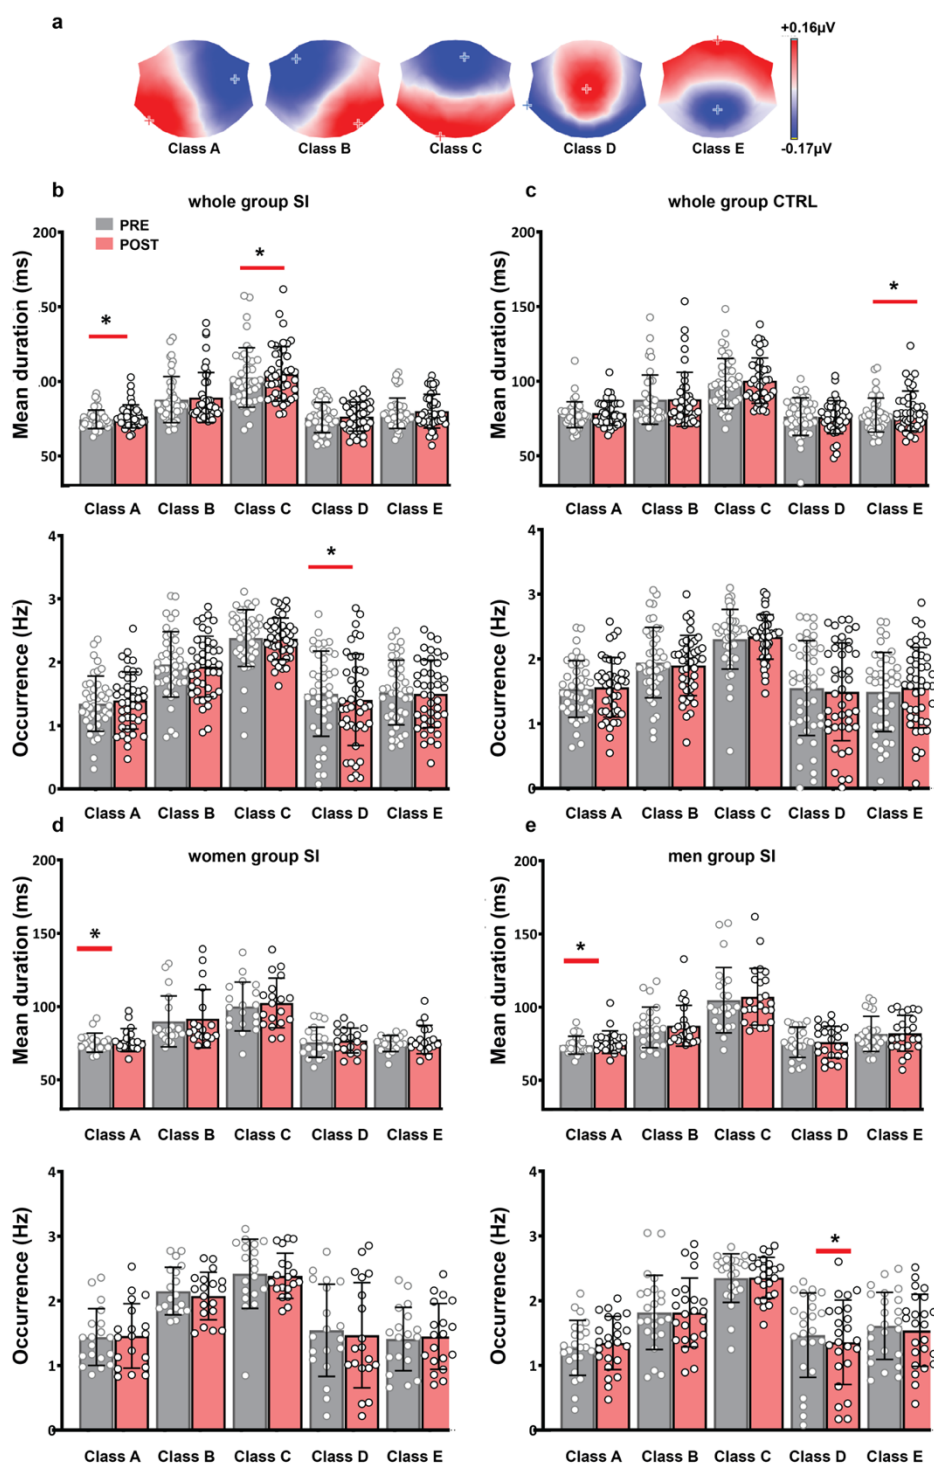

**Figure 4. Microstate dynamics following social imitation. (a)** Identified classes of microstates. **(b)** SI-induced changes in mean duration (top) and occurrence (bottom) for each class. **(c)** Changes in mean duration (top) and occurrence (bottom) following CTRL task. **(d)** SI-induced changes in class duration (top) and occurrence (bottom) in women. **(e)** SI-induced changes in class duration (top) and occurrence (bottom) in men, \* $p < 0.05$ .

217 In women, we found a substantial effect of time ( $N=19$ ,  $PRE=82.12\pm 4.11$ ,  $POST=85.12\pm 5.10$ ,  $F$   
218  $(1,18)=11.9$ ,  $p=0.002$ ,  $0.39 \eta_p^2$ ), a main effect of condition ( $SI=84.12\pm 4.42$ ,  $CTRL=82.40\pm 4.21$ ,  
219  $F=(1,18)=9.54$ ,  $p=0.006$ ,  $0.34 \eta_p^2$ ) and a main effect of microstates *duration* ( $A=76.24\pm 6.94$ ,  
220  $B=90.78\pm 18.5$ ,  $C=101.24\pm 16.17$ ,  $D=76.2\pm 9.2$ ,  $E=76.15\pm 7.3$   $F(4, 72)=12.57$ ,  $p<0.0001$ ,  $0.41 \eta_p^2$ ).  
221 At the level of paired Wilcoxon analyses, we found a significant POST SI increased *duration* of  
222 microstates A ( $N=19$ ,  $PRE=75.36\pm 6.47$ ,  $POST=77.13\pm 7.8$ ,  $p=0.04$ ), and a trend for increased E  
223 microstates *duration* ( $N=19$ ,  $PRE=74.77\pm 5.48$ ,  $POST=77.52\pm 9.73$ ,  $p=0.07$ , **Fig. 4d**). After the  
224 CTRL task we found a significant increased E microstates *duration* ( $N=19$ ,  $PRE=73.95\pm 9.15$ ,  
225  $POST=76.28\pm 9.36$ ,  $p=0.02$ ).

226 In men, we found a significant main effect of microstates ( $N=24$ ,  $A=75.01\pm 6.51$ ,  $B=86.67\pm 13.59$ ,  
227  $C=105.9\pm 20.26$ ,  $D=76\pm 10.36$ ,  $E=81.89\pm 10.86$ ,  $F(4,88)=31.12$ ,  $p<0.00001$ ). At the level of paired  
228 Wilcoxon analyses, there was a significant difference between PRE and POST SI microstates class  
229 A *duration* in men ( $N=24$ ,  $PRE=73.96\pm 6$ ,  $POST=76.05\pm 7.73$ ,  $p=0.04$ ), and also a trend for class  
230 C increased duration ( $N=24$ ,  $PRE=104.72\pm 22.3$ ,  $POST=107\pm 19.44$   $p=0.063$ , **Fig. 4e**). After the  
231 CTRL task we found a trend for increased E microstates *duration* ( $N=24$ ,  $PRE=79.95\pm 12.42$ ,  
232  $POST=83.01\pm 15.31$ ,  $p=0.09$ ).

233 With respect to microstate *occurrence* for women and men, we found a main effect of microstates  
234 in both women ( $A=1.53\pm 0.39$ ,  $B=2.10\pm 0.39$ ,  $C=2.34\pm 0.33$ ,  $D=1.48\pm 0.76$ ,  $E=1.43\pm 0.49$   
235  $F(4,72)=12.1$ ,  $p<0.00001$ ,  $0.40 \eta_p^2$ , **Fig. 4d**) and men ( $A=1.39\pm 0.33$ ,  $B=1.79\pm 0.43$ ,  $C=2.34\pm 0.25$ ,  
236  $D=1.48\pm 0.52$ ,  $E=1.57\pm 0.46$   $F(4,84)=24.5$ ,  $p<0.0001$ ,  $0.53 \eta_p^2$ , **Fig. 4e**). The separate paired  
237 Wilcoxon analyses by gender showed decreased occurrence for class D only in men  
238 ( $PRE=1.46\pm 0.65$ ,  $POST=1.35\pm 0.65$ ,  $p=0.005$ , **Fig. 4e**).

239

## 240 **Microstate transition probabilities**

241 In addition to the temporal characteristics for each microstate, we also investigated if SI affects  
242 the probability of transitions between microstates. For each subject we computed the number of  
243 transitions from each of the five classes to any of the other classes. These values were then  
244 normalized to all between-class transitions to obtain the final fractions for each of the twenty

245 transitions pair ( $A \rightarrow B$ ,  $A \rightarrow C$ ,  $A \rightarrow D$ ,  $A \rightarrow E$ , etc). The repeated three-way ANOVA revealed a  
 246 main effect of time (PRE=0.0482±0.0012 vs POST=0.0486±0.0009  $F(1,42)=10.9$ ,  $p=0.001$ , 0.20  
 247  $\eta_p^2$ ), and a main effect of transition pair  $F(19,798)=25.9$ ,  $p<0.00001$ , 0.38  $\eta_p^2$ ). In addition, we  
 248 identified several two-way significant interactions: the time by transition pair ( $F(19,798)=0.001$ ,  
 249 0.05  $\eta_p^2$ ), and the condition by transition ( $F(19,798)=1.63$ ,  $p=0.04$ , 0.03  $\eta_p^2$ ). The  $B \rightarrow A$   
 250 (SI=0.045±0.02, CTRL=0.053±0.03,  $p=0.048$ ),  $B \rightarrow C$  (SI=0.092±0.04, CTRL=0.081±0.04,  
 251  $p=0.01$ ) and  $C \rightarrow B$  transitions (SI=0.091±0.04, CTRL=0.082±0.04,  $p=0.02$ ) differed significantly  
 252 between the SI and CTRL conditions. Whereas the  $A \rightarrow C$  (PRE=0.052±0.01, POST=0.056±0.02,  
 253  $p=0.021$ ,  $C \rightarrow A$  (PRE=0.052±0.01, POST=0.056±0.01,  $p=0.021$ ),  $C \rightarrow D$  (PRE=0.059±0.02,  
 254 POST=0.056±0.02,  $p=0.031$ ),  $C \rightarrow E$  (PRE=0.062±0.03, POST=0.067±0.03,  $p=0.0008$ ) and  $E \rightarrow C$   
 255 (PRE=0.063±0.03, POST=0.067±0.03,  $p=0.0062$ ) differed significantly between PRE and POST.

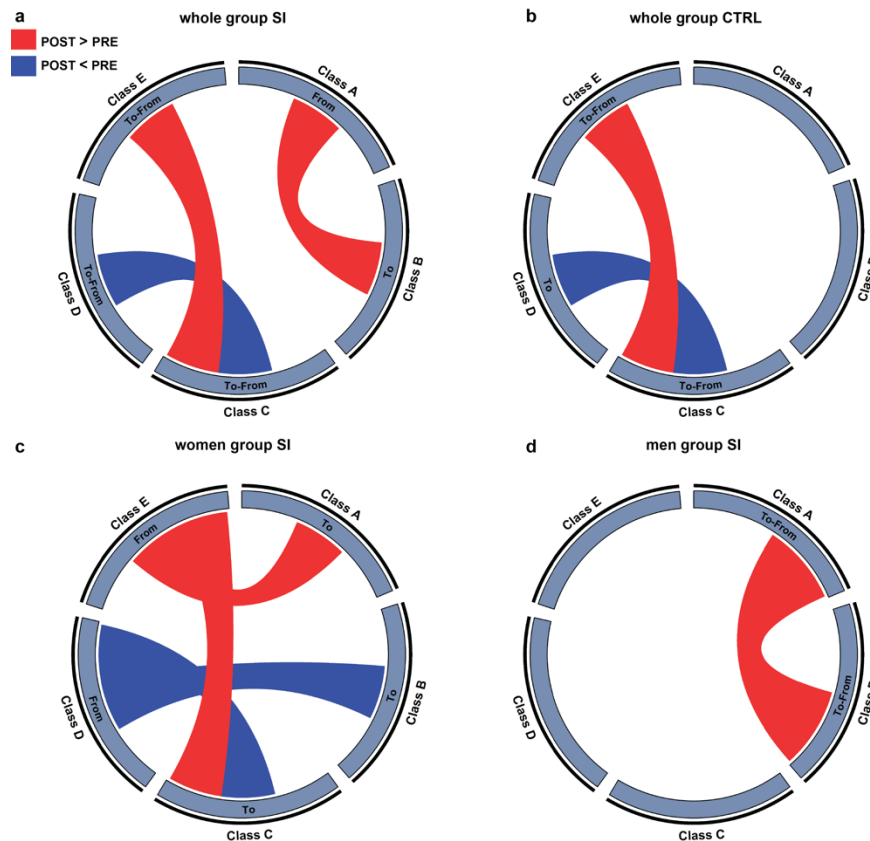

**Figure 5. Microstate transition probability following social imitation.**

(a) Significant changes in transition probability following SI task.  
 (b) Significant changes in transition probability following CTRL task.  
 (c) Significant changes in transition probability following SI in women.  
 (d) Significant changes in transition probability following SI in men.

259 Separate paired Wilcoxon analyses enabled the identification of transition pairs that showed  
 260 significant modulations by the SI task (Fig. 5a-d). There were several microstate pairs that showed  
 261 increased transition after the SI:  $A \rightarrow B$  (PRE=0.043±0.02, POST=0.046±0.02,  $p=0.019$ ),  $C \rightarrow E$

262 (PRE=0.063±0.04, POST=0.069±0.04, p=0.034) and E→C (PRE=0.067±0.04, POST=0.07±0.03,  
263 p=0.034). We also noted decreased frequency of transitions between C and D microstates: C→D  
264 (PRE=0.058±0.02, POST=0.056±0.02, p=0.04), D→C (PRE=0.058±0.02, POST=0.055±0.02,  
265 p=0.031) (**Fig. 5a**). However, we also found significant transition modulations following the  
266 CTRL task, when C→D decreased (PRE=0.061±0.03, POST=0.057±0.03, p=0.023), and C→E  
267 (PRE=0.061±0.03, POST=0.066±0.03, p=0.0063) and E→C (PRE=0.058±0.03,  
268 POST=0.065±0.03, p=0.027) increased in frequency (**Fig. 5b**).

269 In gender subgroups we found a main effect of transition pair in both women (F(19, 342)=11.28,  
270 p<0.00001, 0.38  $\eta_p^2$ ) and men (F(19, 437)=20.62, p<0.00001, 0.47  $\eta_p^2$ ), and a main effect of time  
271 in both women (PRE=0.048±0.001, POST=0.044±0.001, F(1,18)=6.97, p=0.01, 0.27  $\eta_p^2$ ) and men  
272 (PRE=0.048±0.001, POST=0.044±0.001 – F (1,23)= 5.28, 0.031, 0.18  $\eta_p^2$ ). Additionally, in men  
273 we found a main effect of condition (SI=0.0483±0.001, CTRL=0.0488±0.0007, F(1,23)=4.30,  
274 p=0.049, 0.15  $\eta_p^2$ ), and a significant two way (time by transition) interaction (F(1,437)=1.67,  
275 p=0.037, 0.06  $\eta_p^2$ , A→C PRE=0.051±0.01, POST=0.056±0.01, p=0.02, C→E PRE=0.069±0.03,  
276 POST=0.037±0.01, p=0.01). Finally, in the men group we also found a three-way interaction, for  
277 time by condition by microstate transition (F(19, 437)=1.62, p=0.04, 0.06  $\eta_p^2$ , **Fig. 5c,d**).

278

## 279 **Spontaneous thoughts and microstate SI modulation**

280 To investigate how the observed SI-induced changes in microstates might reflect changes in the  
281 pattern of spontaneous thought, we conducted a partial least squares (PLS) analysis, a multivariate  
282 analysis that finds latent variables (LVs) which optimally link two sets of data by maximizing the  
283 covariance between the two. We found a significant LV (permuted p=0.012, 52% of covariance  
284 explained) for microstate *duration* (**Fig. 6a,b**). Changes in C and B microstate *duration* were  
285 positively correlated with thoughts about future plans (*planning*), and negatively associated with  
286 SI modulations of thoughts about *self* and thoughts about others. Microstates D and E showed the  
287 reversed patterns of associations (**Fig. 6c-e**).

288 Results on *occurrence* modulations association with ARSQ change scores showed a significant  
289 LV (p=0.004, 54% explained covariance). Occurrence of microstates A and B was positively

290 associated with *planning* and *verbal* thoughts. On the contrary, *occurrence* of microstate E was  
291 negatively associated with these aspects of spontaneous thoughts (**Fig. S1**).

292 We performed a separate PLS analysis using the SI dynamics of transition probabilities and SI  
293 dynamics of ARSQ scores in order to explore possible associations (**Fig. 6f-i**). We found a  
294 significant LV ( $p=0.0009$ , 53% explained covariance). For most transitions to A, B, C or D  
295 microstates we found a negative association with *discontinuity of mind*, *others*, *self*, *sleepiness*,  
296 *comfort* and a positive association with *planning*, *health* and *verbal* thoughts. From most  
297 microstates to E microstate, and for the E to D transitions, we found the reversed pattern of  
298 associations (**Fig 6j**). There were no associations found with *somatic awareness* and with *visual*  
299 thoughts.

300 These data indicate that the *duration* and *occurrence* of certain microstates could predict aspects  
301 of spontaneous thought content, whereas microstate *transition probability* could, in addition to  
302 content, also predict spontaneous thought dynamics, modality, and association with physiological  
303 states.

304

### 305 **Associations between microstate dynamics and salivary OXT following SI**

306 To investigate if salivary OXT might point to a potential mechanism for how SI modulates  
307 microstate temporal features and transition probability, we tested if the dynamics of salivary  
308 oxytocin ( $\Delta$ OXT) correlate with the dynamics of microstates duration, occurrence and transition  
309 probability (**Fig. 7**). There was no significant correlation between changes in OXT and either the  
310 *duration* or the *occurrence* of microstate classes (**Fig. 7c**). Similarly, in the whole group analysis  
311 there was no significant association between changes in OXT and transition probability (**Fig. 7b**).  
312 However, in women we found that  $\Delta$ OXT negatively correlated with  $\Delta A \rightarrow C$  (Gamma  $r=-0.47$ ,  
313  $p=0.01$ ), and positively correlated with  $\Delta B \rightarrow E$  (Gamma  $r=0.45$ ,  $p=0.02$ ). In men we found a  
314 positive association of  $\Delta$  OXT with  $\Delta D \rightarrow B$  (Gamma  $r=0.32$ ,  $p=0.03$ ), as well as with  $\Delta B \rightarrow D$   
315 (Gamma  $r=0.32$ ,  $p=0.03$ ).

316

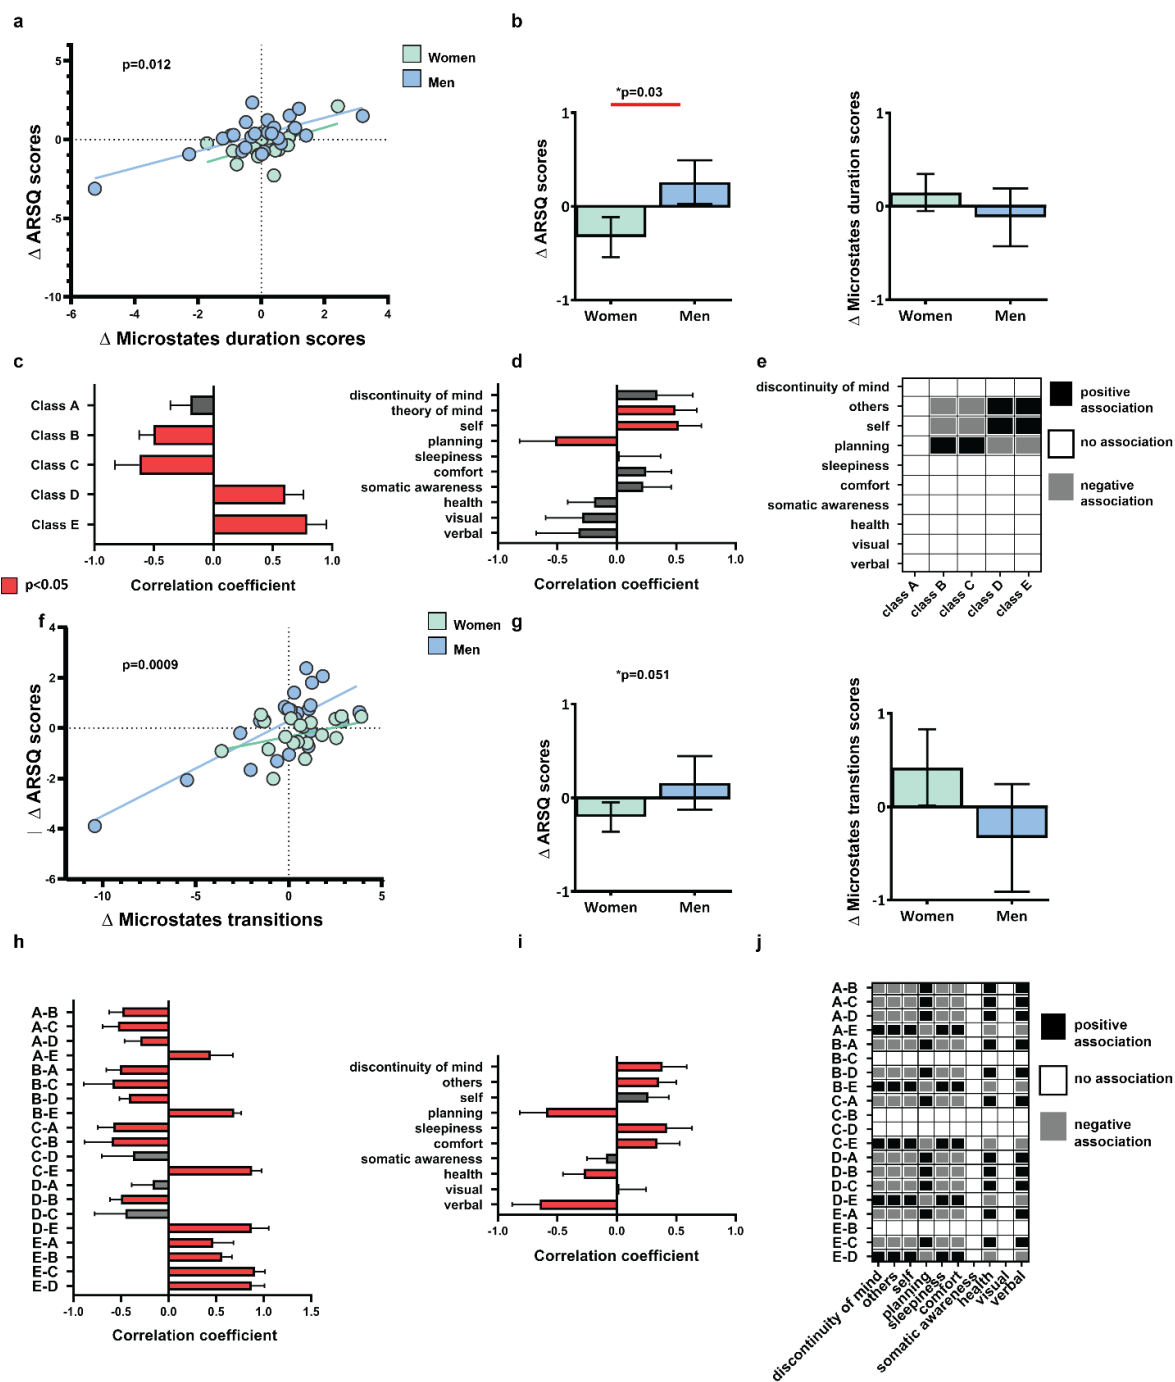

317

**Figure 6. Association between microstate dynamics and spontaneous thoughts.**

(a) Correlation between individual-specific changes in ARSQ scores and changes in microstate duration. (b) Group differences in composite scores of ARSQ and microstate duration change. (c) Correlations between original and composite microstate duration scores (d) Correlations between original and composite ARSQ scores (e) Specific associations between microstate duration and spontaneous thoughts (f) Correlation between individual-specific changes in ARSQ scores and changes in microstate transitions. (g) Group differences in composite scores of ARSQ and microstate transitions change. (h) Correlations between original and composite microstate transition scores (i) Correlations between original and composite ARSQ scores (k) Specific associations between microstate transitions and spontaneous thoughts.



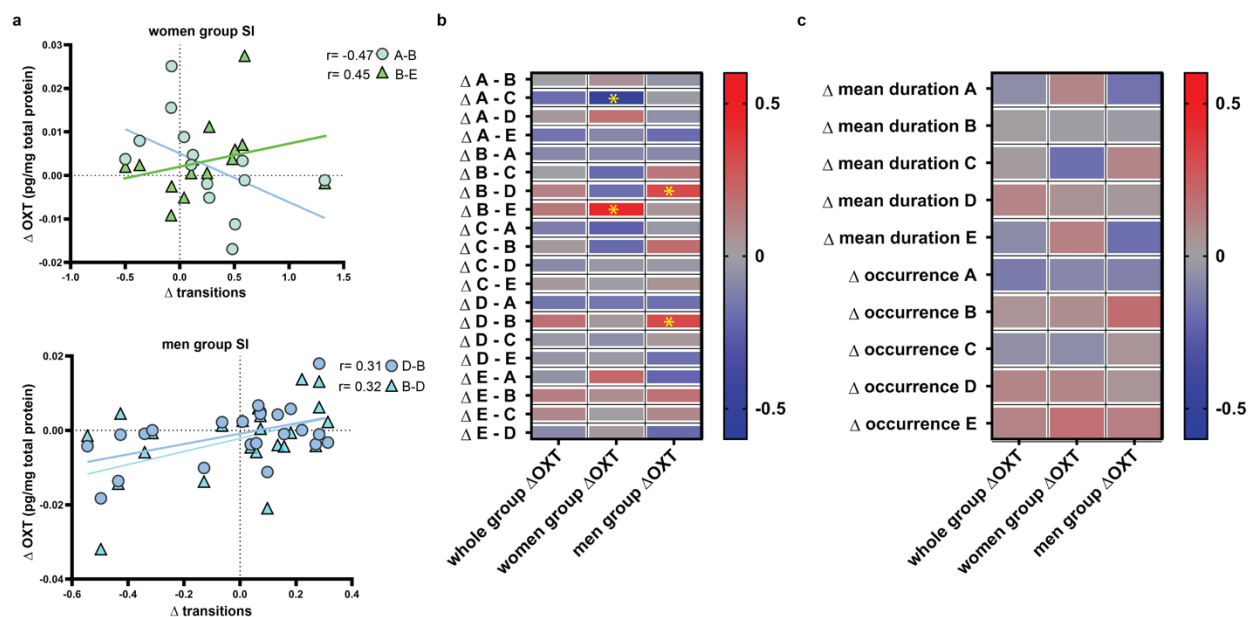

318

**Figure 7. Association between changes in OXT and microstate temporal dynamics.** (a) Example correlations between SI-specific changes in microstate transitions, and in salivary OXT (b) Summary of results for associations between changes in microstate transitions, and changes in salivary OXT following SI (c) Summary of results for associations between changes in microstate duration, occurrence, and changes in salivary oxytocin following SI.

319

### 320 Associations between personality traits and temporal dynamics of EEG microstates

321 Responses to SI depend in part on personality traits (Papasteri, Sofonea et al. 2020). Similarly,  
 322 personality traits impact spontaneous thought patterns (Diaz et al., 2014). Here, we investigated if  
 323 SI modulations of spontaneous thoughts vary as a function of personality traits as measured by the  
 324 NEO PI-R inventory. We found a significant LV ( $p=0.001$ , explaining 63% of covariance),  
 325 revealing associations between personality traits, and SI modulation of ARSQ scores (Fig. 2a-e).  
 326 *Neuroticism*, certain aspects of *openness* and *modesty* traits were positively associated with  
 327 increases following SI of thoughts about self, of verbal thoughts and awareness of own  
 328 physiological state during resting (Fig. S2e). *Extraversion* and *conscientiousness* traits were  
 329 positively correlated with SI modulation of thoughts about planning and of visual imagery (Fig.  
 330 S2e). These findings suggest that SI could be more beneficial for those with higher scores on  
 331 extraversion and conscientiousness.

332 If changes in neural activity captured by changes in microstate properties serve as mechanisms for  
333 the effects of SI, we would expect to see associations between personality traits and microstate  
334 dynamics. Therefore, we conducted PLS analyses testing for associations between personality  
335 traits and microstates temporal dynamics. We found one LV (LV-  $p=0.007$ , 68% of covariance  
336 explained) showing that temporal dynamics of microstates following SI varied as a function of  
337 personality traits (**Fig. S3a**). Changes in microstates C, A, and B *duration* were positively related  
338 to *extraversion* and *conscientiousness* traits. The inverse pattern of association was present for  
339 microstate E. No significant LV was found explaining the *occurrence* changes as a function of  
340 personality traits. In summary, the significant changes in microstates *duration* following SI were  
341 more pronounced in those with higher scores in extraversion, conscientiousness and/or lower  
342 neuroticism, modesty and openness scores.

343

## 344 **Discussion**

345 Imitation has been shown to have powerful effects on behavioural and emotional states in human  
346 and non-human primates<sup>36,39</sup>. So far, the search for a mechanism focused on changes in neural  
347 activity induces during imitation<sup>37</sup>. Here, we rely on previous findings linking mind-wandering to  
348 emotional states, to investigate if imitation might also act by changing the pattern of spontaneous  
349 thoughts. We find that imitation can indeed impact the dynamics, content and association with  
350 physiological states of mind-wandering episodes (**Fig. 1**), potentially by changing the pattern of  
351 correlated neuronal activity (**Fig. 4, 5**). Further investigation is needed to determine if reported  
352 changes in spontaneous thoughts causally relate to changes in behavioural states and in salivary  
353 oxytocin.

### 354 **Association between spontaneous thoughts and behavioural state**

355 We find that certain imitation-sensitive features of spontaneous thought dynamics and content  
356 positively associate with improvements in stress, well-being and closeness to the imitated person  
357 (**Fig. 1,2**). This finding adds the social implication to the reported effects of mind-wandering. Our  
358 findings on stress and well-being seem to contradict prior research. Previous studies report that  
359 negative mood and mind-wandering reinforce each other: spontaneous thoughts lead to sadness,

360 which then leads to more mind-wandering<sup>7,10,11</sup>. The apparent differences in our findings, namely  
361 the fact that mind-wandering can lead to improved behavioural states, could result from probing  
362 stress levels instead of affect valence, or from focusing on mind-wandering episodes around a  
363 generally agreeable task. The later possibility would support the notion that contexts have a  
364 substantial impact on spontaneous thoughts and on their ability to impact behaviour. The reverse  
365 sequence could also be true, where contexts impact behavioural states, which in turn modulate  
366 spontaneous thoughts. In this manuscript we do not establish a causal link, and further  
367 investigations will be needed to establish if such a link exists.

### 368 **Association with changes in OXT**

369 The hormone OXT, known to play an important role in social bonding when acting centrally<sup>40</sup>, has  
370 been shown to increase following social imitation<sup>36,38</sup>. However, in previous work, we showed that  
371 while salivary OXT can predict well-being following SI, it does not associate with increased  
372 closeness for imitated partner<sup>36</sup>. This is consistent with our current findings where we report a  
373 negative association between salivary OXT and *discontinuity of mind*, a feature of mind-wandering  
374 that positively correlates with stress, and that decreases following imitation. One possibility is that  
375 increased OXT after SI acts on the dynamics of spontaneous thoughts to decreased stress levels.  
376 Also consistent with our previous report<sup>36</sup>, salivary OXT negatively associate with thoughts about  
377 planning, a correlate of increased social closeness following imitation. All results regarding  
378 salivary OXT should be interpreted with caution, as the levels of OXT in any peripheral fluid do  
379 not accurately reflect central actions of OXT<sup>41,42</sup>. Although the relationship between oxytocin and  
380 spontaneous thoughts has not been reported before, other hormones have been linked to mind-  
381 wandering. Changes in the level of the stress-related hormones cortisol and alpha-amylase have  
382 been associated with negative spontaneous thoughts<sup>43</sup>.

### 383 **Association with microstate dynamics**

384 Our results show that changes in neural activity captured by microstate analysis could potentially  
385 explain changes in spontaneous thoughts and well-being following imitation. We find that the  
386 *duration* of microstate C, generally linked to activity in the DMN, increased after imitation (**Fig.**  
387 **4**), and is positively associated with thoughts about planning, which also increase after imitation,  
388 and positively correlate with social closeness and well-being. Although we also observed changes

389 in microstate D *occurrence* after imitation, they seemed to have less predictive potential for  
390 changes in spontaneous thought pattern and in behavioural states. However, the observed SI  
391 modulation of both microstate C and D are in line with previous findings on changes during  
392 relaxing behavioural states<sup>32,33,34,35</sup>. Changes in microstate transition probability following  
393 imitation were associated not only with changes in the content of spontaneous thought but also in  
394 their dynamics (**Fig. 6**), and in most cases were consistent with the effects of imitation on  
395 spontaneous thoughts. Additionally, we found a distinct pattern of association between SI  
396 modulation on microstate transitions and OXT (**Fig. 7**) in men compared to women. This supports  
397 previous data on the sexually dimorphic action of OXT, and on the role of microstate dynamics  
398 underlying different patterns of information processing<sup>44,45</sup>. In agreement with previous finding  
399 that salivary OXT increases in women but not men following SI<sup>36</sup>, we further show that only in  
400 women the change in OXT is associated with slower transitions from microstate A (generally  
401 linked to activity in language/auditory cortices) to microstate C (associated to posterior DMN  
402 activations)<sup>26,31</sup>.

403 Could ongoing, stimulus- and task-independent brain activity impact spontaneous thoughts and  
404 possibly subsequent behavioural states? The impact of ongoing neuronal activity on task-related  
405 performances has been studied extensively in both animal models and humans<sup>46,47</sup>, yet the  
406 association between ongoing activity patterns and spontaneous thoughts has been more difficult to  
407 establish, due to the fleeting nature and unpredictability of spontaneous thoughts. In addition to  
408 our current findings linking ongoing patterns of microstate activity with dynamics and content of  
409 spontaneous thoughts, previous work showed that patients suffering from neuropsychiatric  
410 disorders with abnormal mind-wandering patterns have significant differences in microstate  
411 dynamics<sup>48-54</sup>.

412 Taken together, our findings highlight the effect of social imitation on spontaneous thoughts, and  
413 the potential neural and biochemical substrates involved. Our findings should fuel research into  
414 potential therapies using social context-dependent changes in spontaneous thoughts.

415

416

## 417 **Methods**

### 418 *Ethical considerations*

419 All methods and experiments have been approved by The Ethics Committee of National University  
420 for Theatre and Film I.L. Caragiale Bucharest, and followed the guidelines of the Declaration of  
421 Helsinki. All participants provided written informed consent for their participation. The instructor  
422 and subject shown in **Figure 1a**, both gave their written consent to have their faces shown in the  
423 manuscript.

### 424 *Experimental paradigm*

425 This study investigates social imitation (SI) task modulations of resting-state EEG, OXT and  
426 behavioural states. Data from each participant was assessed across the different tasks (SI vs CTRL)  
427 on two separate days in a counterbalanced, randomized fashion, with at least one week delay  
428 between the two experimental days.

429 As depicted in Figure 1, during the SI task participants were asked to imitate in real time the  
430 stereotyped, geometrical arm movements produced by an instructor (e.g. draw a circle in the air).  
431 The SI task lasted for 3 minutes during which the instructor provided positive verbal cues (e.g.  
432 “very well”) and positive non-verbal cues (e.g. smile, nodding yes). During CTRL task no social  
433 interaction was available and participants were asked to imitate the geometrical movements  
434 displayed on a screen (3 minutes).

### 435 *Participants and data collection*

436 Participants in the study were recruited through advertisement within the University of Bucharest,  
437 University of Theatre and Film and the CINETic’s Research Centre website  
438 <https://cinetic.arts.ro/en/met-2/>. The exclusion criteria included neurologic and psychiatric  
439 symptoms. Of the 65 subjects that were initially recruited, several (N=7) were excluded from the  
440 analysis due to movement contamination of the EEG data and several (N=15) dropped out of the  
441 experiment before the collection of the second day of the experiment. The remaining dataset thus  
442 included 43 participants (24 men, 19 women), mean age=25.7 (age range: 20-42), s.d.=5.1.  
443 (Women mean age=25.57, s.d.=5.3; Men mean age=25.9, s.d.=5.1). The sample group included in

444 the correlation analyses between OXT or personality traits and EEG temporal dynamics was  
445 composed of 37 participants (18 men and 19 women). Six participants were excluded from these  
446 analyses due to missing OXT and NEO-PI-R data.

447 EEG data were acquired in a dimly light room using a 128-channel ANT Neuro waveguard™  
448 system (<https://www.ant-neuro.com/>) sampled online at 1kHz with a Cz reference. Participants  
449 sat in a comfortable, upright position and were instructed to stay awake, as calm as possible, to  
450 keep their eyes closed and to relax for five minutes without falling asleep.

451 Salivary oxytocin (OXT) were collected using specially designed tubes (Salivette®, Sarstedt).  
452 Participants were instructed to saturate the saliva swab by holding for at least 2 minutes in the  
453 mouth. The tubes were then centrifuged at 1000 x g, at 4° C, for 25 minutes and the samples were  
454 aliquoted in 1,5 ml Eppendorf vials and stored at -80° C prior to analysis. Oxytocin was measured  
455 by radioimmunoassay (RIA) at RIAGnosis, Munich, Germany, while total proteins were measured  
456 at National Institute of Endocrinology “C. I. Parhon”, Bucharest, Romania. Salivary total protein  
457 was used to normalize the concentration of salivary oxytocin levels, since its concentration can  
458 vary significantly with saliva viscosity.

459 Self-reported data were collected in the same room as the EEG data and consisted of several pen-  
460 paper tests. The inclusion of others in the self (IOS)<sup>55</sup> a single item measure of closeness composed  
461 of two Venn-like circles varying in their degree of overlap. Participants were instructed to select  
462 the diagram reflecting the relationship with the instructor that guided the participants throughout  
463 the social interaction task. Two visual analog scales (VAS) assessed the self-reported level of stress  
464 and well-being using a 10-cm unmarked scale ranging from 0 “no stress”/”worst unimaginable  
465 well-being” up to 100 “most stress ever”/”perfect well-being”.

466 The Neo Personality Inventory –Revised (NEO PI-R) is a 240 item personality inventory with  
467 cross-culturally established psychometric properties and validity<sup>56</sup> that assesses the Big Five  
468 Model domains of Neuroticism, Extraversion, Openness to Experience, Agreeableness and  
469 Conscientiousness with the 6 factors for each domain. Participants responded on a 5-point Likert  
470 scale ranging from 0 (strongly disagree) to 4 (strongly agree).

471 The Amsterdam Resting-State Questionnaire 2.0 is a self-report questionnaire that quantifies mind  
472 wandering along ten model: Discontinuity of Mind, Theory of Mind, Self, Planning, Sleepiness,  
473 Comfort, Somatic Awareness, Health Concern, Visual Thought, Verbal Thought<sup>9</sup>. Participants had  
474 to responded to a total of 30 items using a 5-point Likert Scale from “Completely Disagree” to  
475 “Completely Agree”.

#### 476 *EEG data processing*

477 The EEG datasets were band-pass filtered offline between 1 and 40 Hz with an additional notch at  
478 50 Hz. EEG periods of movement contamination or other artifacts were marked and excluded from  
479 the analyses. In order to remove the oculomotor artifacts such as saccades and eye blinks as well  
480 as the cardiac artefacts (ECG), we applied the Infomax-based Independent Component  
481 Analysis (ICA)<sup>57</sup>. Bad or noisy electrodes were interpolated using a 3-D spherical spline<sup>58</sup>, and  
482 were recomputed to the common average-reference. The data were then down-sampled to 125 Hz  
483 for further analysis.

484 The local maxima of the Global Field Power (GFP) show an optimal signal to noise-ratio in the  
485 EEG<sup>58,59</sup>. The EEG signal was extracted at the corresponding time frame of GFP peaks and only  
486 the time points of GFP peaks were submitted to a modified k-means cluster analysis<sup>59,60</sup> in order  
487 to identify the most representative classes of stable topographies.

488 The k-means clustering was performed in two steps: first, at the individual level, and, in a second  
489 step, at the group level by clustering all individual dominant topographies with varying number of  
490 clusters. In order to determine the optimal number of clusters at the individual and the group level,  
491 we used the criteria implemented in Cartool (a free academic software developed by Denis Brunet;  
492 [cartoolcommunity.unige.ch](http://cartoolcommunity.unige.ch)), based on seven maximally independent criteria: Davies and Bouldin,  
493 Gamma, Silhouette, Dunn Robust, Point-Biserial, Krzanowski-Lai Index, and Cross-Validation  
494 <sup>31,59,61</sup>.

495 In the first part of the microstate analysis, only GFP peaks were submitted to the k-means  
496 clustering. However, in the second part of the analysis, during the fitting process of the microstates,  
497 the entire EEG of participants was used, excluding only the marked artifact epochs. A temporal  
498 smoothing (window half-size 3 (24 ms), Besag factor of 10 and a rejection of small time frames

499 (when  $<3$ , i.e. 24 ms) was applied<sup>59</sup>. Subsequently, in order to quantify the temporal parameters of  
500 microstates, every time point of the individual data was assigned to the microstate cluster with  
501 which it correlated best<sup>60</sup>. A 0.5 correlation coefficient threshold was used in order to exclude  
502 transient periods of noise in the data. These periods were not labelled and were excluded from the  
503 analysis.

504 This fitting process enabled the determination of the duration and the occurrence of each microstate  
505 in each subject. The *duration* represents the average amount of time (in ms) that a given microstate  
506 map was present without interruptions, i.e. the duration during which the subject remained in a  
507 certain state. The duration is one of the most commonly used parameters of the temporal structure  
508 of microstates and has repeatedly been shown to be associated with different vigilance conditions  
509 and symptoms of neuropsychiatric disorders<sup>62</sup>. The mean *occurrence* of a microstate is  
510 independent of the duration. It indicates the rate at which a given microstate occurred, i.e. how  
511 many times per second the brain enters a certain state.

512 In addition to these two temporal parameters for each microstate, we also analysed the between  
513 microstate transition dynamics: for each subject and transition pair we computed the number of  
514 transitions and normalized them by all between-class transitions<sup>45,63</sup>.

515 The free academic software Cartool ([cartoolcommunity.unige.ch](http://cartoolcommunity.unige.ch)) was used for the EEG data  
516 processing and microstate analysis<sup>61</sup>.

### 517 *Statistical analyses*

518 In order to assess the specific modulations of spontaneous thoughts after the SI we utilized a three-  
519 way repeated measures ANOVA with three factors: the ARSQ factors (10), time (PRE-POST),  
520 and task (SI or CTRL). The averaged ARSQ scores across the different experimental conditions  
521 (PRE-SI, POST-SI, PRE-CTRL, POST-CTRL) were averaged for each individual and correlation  
522 analyses to investigate associations with behavioural states (stress, well-being and IOS) and  
523 salivary OXT. We used Gamma non-parametric correlation analyses which can inform us on the  
524 strength of their association disregarding possible outliers and tied ranks in the data.

525 Similarly, for both microstate temporal parameters (duration and occurrence) and transition  
526 probabilities for each directional transition pair (20). Separate three-way repeated measures



527 ANOVA's with time (PRE- POST), classes of microstates (5)/transition pairs (20), and task (SI or  
528 CTRL) as within factors was performed. We performed non-parametrical Wilcoxon paired test to  
529 further assess main drivers of significant main effects. Additionally, to assess the degree of gender  
530 differences of these effects we performed separate statistical analyses on men and women  
531 subgroups.

532 In order to identify robust patterns of correlations between the behavioural measures and the  
533 temporal dynamics of the EEG microstates, we used a multivariate approach called partial least  
534 squares (PLS)<sup>64</sup>. PLS is a multivariate data-driven statistical technique that maximizes the  
535 covariance between two matrices by deriving *latent variables* (LVs), which are optimal linear  
536 combinations of the original matrices<sup>65</sup>. PLS is a powerful technique for relating two sets of data  
537 (e.g., neuroimaging and behavioral data), even if these data show autocorrelation or  
538 multicollinearity<sup>64</sup>.

539 Each LV is characterized by a distinct EEG microstate pattern (called EEG *loadings*) and a distinct  
540 behavioral profile (called behavioral *loadings*). By linearly projecting the EEG and behavioral  
541 measures of each participant onto their respective loadings, we obtained individual-specific EEG  
542 microstates and behavioral *composite scores* for each LV. PLS seeks to find loadings that  
543 maximize across-participant covariance between the EEG microstates parameters and behavioral  
544 composite scores. The number of significant LVs was determined by a permutation test (1000  
545 permutations). The p-values (from the permutation) for the first five LVs were corrected for  
546 multiple comparisons using a FDR of  $q < 0.05$ . To interpret the LVs, we computed Pearson's  
547 correlations between the original EEG data and EEG composite scores, as well as between the  
548 original behavioral measures and behavioral composite scores for each LV. A large positive (or  
549 negative) correlation for a particular behavioral measure for a given LV indicates greater  
550 importance of the behavioral measure for the LV. Similarly, a large positive (or negative)  
551 correlation for a particular EEG microstate parameter for a given LV indicates greater importance  
552 of the EEG microstate parameter for the LV. To estimate confidence intervals for these  
553 correlations, we applied a bootstrapping procedure that generated 500 samples from subjects' data.  
554 Z-scores were calculated by dividing each correlation coefficient by its bootstrap-estimated  
555 standard deviation. The z-scores were converted to p-values and FDR-corrected ( $p < 0.05$ )<sup>66</sup>.

556

557

## 558 **AUTHOR CONTRIBUTIONS**

559 All authors contributed to the design of the experiment and interpretation of results. MIT (first  
560 author) analyzed all data, in collaboration with CP and VK. MIT, AS, RB conducted the  
561 experiments and data collection. MIT and IC wrote the manuscript, with feedback from all authors.

562

## 563 **ACKNOWLEDGEMENT**

564 We thank Prof. Nicolae Manda, Prof. Liviu Lucaci and Prof. Carmen Croitoru for their  
565 administrative support, Dr. Robert C. Froemke and Dr. Justin S. Riceberg for consultation,  
566 Nicoleta Pușcașu and Doina Strat for their technical support. The Cartool software  
567 (cartoolcommunity.unige.ch) has been programmed by Denis Brunet, from the Functional Brain  
568 Mapping Laboratory (FBMLab), Geneva, Switzerland, and is supported by the Center for  
569 Biomedical Imaging (CIBM) of Geneva and Lausanne.

570

## 571 **FUNDING**

572 The project “Developing a methodology of therapy through theatre with an effect at the  
573 neurochemical and neurocognitive levels” (MET) is co-financed by the European Regional  
574 Development Fund (ERDF) through Competitiveness Operational Programme 2014-2020, SMIS  
575 code 106688 and implemented by UNATC “I.L. Caragiale”, CINETic Centre, LDCAPEI LAB.

576

## 577 **CONFLICT OF INTEREST**

578 The authors declare that the research was conducted in the absence of any commercial or financial  
579 relationships that could be construed as a potential conflict of interest.

580

581

582

583 **References**

- 584 1. Klinger, E. and W. M. Cox (1987). "Dimensions of thought flow in everyday life." Imagination,  
585 cognition and personality **7**(2).
- 586 2. Smallwood, J. and J. W. Schooler (2006). "The restless mind." Psychol Bull **132**(6): 946-958.
- 587 3. Killingsworth, M. A. and D. T. Gilbert (2010). "A wandering mind is an unhappy mind." Science  
588 **330**(6006): 932.
- 589 4. Christoff, K., Z. C. Irving, K. C. Fox, R. N. Spreng and J. R. Andrews-Hanna (2016). "Mind-wandering  
590 as spontaneous thought: a dynamic framework." Nat Rev Neurosci **17**(11): 718-731.
- 591 5. Song, X. and X. Wang (2012). "Mind wandering in Chinese daily lives--an experience sampling  
592 study." PLoS One **7**(9): e44423.
- 593 6. Andrews-Hanna, J. R., R. H. Kaiser, A. E. Turner, A. E. Reineberg, D. Godinez, S. Dimidjian and M.  
594 T. Banich (2013). "A penny for your thoughts: dimensions of self-generated thought content and  
595 relationships with individual differences in emotional wellbeing." Front Psychol **4**: 900.
- 596 7. Ruby, F. J., J. Smallwood, H. Engen and T. Singer (2013). "How self-generated thought shapes  
597 mood--the relation between mind-wandering and mood depends on the socio-temporal content  
598 of thoughts." PLoS One **8**(10): e77554.
- 599 8. Faber, M. and S. K. D'Mello (2018). "How the stimulus influences mind wandering in semantically  
600 rich task contexts." Cogn Res Princ Implic **3**(1): 35.
- 601 9. Diaz, B. A., S. Van Der Sluis, J. S. Benjamins, D. Stoffers, R. Hardstone, H. D. Mansvelde, E. J. Van  
602 Someren and K. Linkenkaer-Hansen (2014). "The ARSQ 2.0 reveals age and personality effects on  
603 mind-wandering experiences." Front Psychol **5**: 271.
- 604 10. Poerio, G. L., P. Totterdell and E. Miles (2013). "Mind-wandering and negative mood: does one  
605 thing really lead to another?" Conscious Cogn **22**(4): 1412-1421.
- 606 11. Marchetti, I., E. Van de Putte and E. H. Koster (2014). "Self-generated thoughts and depression:  
607 from daydreaming to depressive symptoms." Front Hum Neurosci **8**: 131.
- 608 12. Baumeister, R. F. and E. J. Masicampo (2010). "Conscious thought is for facilitating social and  
609 cultural interactions: how mental simulations serve the animal-culture interface." Psychol Rev  
610 **117**(3): 945-971.
- 611 13. Medea, B., T. Karapanagiotidis, M. Konishi, C. Ottaviani, D. Margulies, A. Bernasconi, N.  
612 Bernasconi, B. C. Bernhardt, E. Jefferies and J. Smallwood (2018). "How do we decide what to do?  
613 Resting-state connectivity patterns and components of self-generated thought linked to the  
614 development of more concrete personal goals." Exp Brain Res **236**(9): 2469-2481.
- 615 14. Shepherd, J. (2019). "Why does the mind wander?" Neurosci Conscious **2019**(1): niz014.
- 616 15. Mills, C., Q. Raffaelli, Z. C. Irving, D. Stan and K. Christoff (2018). "Is an off-task mind a freely-  
617 moving mind? Examining the relationship between different dimensions of thought." Conscious  
618 Cogn **58**: 20-33.
- 619 16. Mildner, J. N. and D. I. Tamir (2019). "Spontaneous Thought as an Unconstrained Memory  
620 Process." Trends Neurosci **42**(11): 763-777.
- 621 17. Baird, B., J. Smallwood, M. D. Mrazek, J. W. Kam, M. S. Franklin and J. W. Schooler (2012). "Inspired  
622 by distraction: mind wandering facilitates creative incubation." Psychol Sci **23**(10): 1117-1122.
- 623 18. Fox, K. C. R. and R. E. Beaty (2019). "Mind-wandering as creative thinking: neural, psychological,  
624 and theoretical considerations." Current opinion in behavioral sciences **27**: 123-130.
- 625 19. Raichle, M. E. (2006). "Neuroscience. The brain's dark energy." Science **314**(5803): 1249-1250.

- 626 20. Mason, M. F., M. I. Norton, J. D. Van Horn, D. M. Wegner, S. T. Grafton and C. N. Macrae (2007).  
627 "Wandering minds: the default network and stimulus-independent thought." *Science* **315**(5810):  
628 393-395.
- 629 21. Christoff, K., A. M. Gordon, J. Smallwood, R. Smith and J. W. Schooler (2009). "Experience sampling  
630 during fMRI reveals default network and executive system contributions to mind wandering." *Proc*  
631 *Natl Acad Sci U S A* **106**(21): 8719-8724.
- 632 22. Stawarczyk, D., S. Majerus, M. Maj, M. Van der Linden and A. D'Argembeau (2011). "Mind-  
633 wandering: phenomenology and function as assessed with a novel experience sampling method."  
634 *Acta Psychol (Amst)* **136**(3): 370-381.
- 635 23. Ellamil, M., K. C. Fox, M. L. Dixon, S. Pritchard, R. M. Todd, E. Thompson and K. Christoff (2016).  
636 "Dynamics of neural recruitment surrounding the spontaneous arising of thoughts in experienced  
637 mindfulness practitioners." *Neuroimage* **136**: 186-196.
- 638 24. Ingvar, D. H. (1979). "'Hyperfrontal' distribution of the cerebral grey matter flow in resting  
639 wakefulness; on the functional anatomy of the conscious state." *Acta Neurol Scand* **60**(1): 12-25.
- 640 25. Fox, K. C., R. N. Spreng, M. Ellamil, J. R. Andrews-Hanna and K. Christoff (2015). "The wandering  
641 brain: meta-analysis of functional neuroimaging studies of mind-wandering and related  
642 spontaneous thought processes." *Neuroimage* **111**: 611-621.
- 643 26. Michel, C. M. and T. Koenig (2018). "EEG microstates as a tool for studying the temporal dynamics  
644 of whole-brain neuronal networks: A review." *Neuroimage* **180**(Pt B): 577-593.
- 645 27. Khanna, A., A. Pascual-Leone, C. M. Michel and F. Farzan (2014). "Reliability of resting-state  
646 microstate features in electroencephalography" *PLoS One* **9**: e114163..
- 647 28. Britz, J., D. Van De Ville and C. M. Michel (2010). "BOLD correlates of EEG topography reveal rapid  
648 resting-state network dynamics." *Neuroimage* **52**(4): 1162-1170.
- 649 29. Musso, F., J. Brinkmeyer, A. Mobascher, T. Warbrick and G. Winterer (2010). "Spontaneous brain  
650 activity and EEG microstates. A novel EEG/fMRI analysis approach to explore resting-state  
651 networks." *Neuroimage* **52**(4): 1149-1161.
- 652 30. Yuan, H., V. Zotev, R. Phillips, W. C. Drevets and J. Bodurka (2012). "Spatiotemporal dynamics of  
653 the brain at rest--exploring EEG microstates as electrophysiological signatures of BOLD resting-  
654 state networks." *Neuroimage* **60**(4): 2062-2072.
- 655 31. Custo, A., D. Van De Ville, W. M. Wells, M. I. Tomescu, D. Brunet and C. M. Michel (2017).  
656 "Electroencephalographic Resting-State Networks: Source Localization of Microstates." *Brain*  
657 *Connect* **7**(10): 671-682.
- 658 32. Katayama, H., L. R. Gianotti, T. Isotani, P. L. Faber, K. Sasada, T. Kinoshita and D. Lehmann (2007).  
659 "Classes of multichannel EEG microstates in light and deep hypnotic conditions." *Brain Topogr*  
660 **20**(1): 7-14.
- 661 33. Milz, P., P. L. Faber, D. Lehmann, T. Koenig, K. Kochi and R. D. Pascual-Marqui (2016). "The  
662 functional significance of EEG microstates--Associations with modalities of thinking." *Neuroimage*  
663 **125**: 643-656.
- 664 34. Faber, P. L., F. Travis, P. Milz and N. Parim (2017). "EEG microstates during different phases of  
665 Transcendental Meditation practice." *Cogn Process* **18**(3): 307-314.
- 666 35. Seitzman, B. A., M. Abell, S. C. Bartley, M. A. Erickson, A. R. Bolbecker and W. P. Hetrick (2017).  
667 "Cognitive manipulation of brain electric microstates." *Neuroimage* **146**: 533-543.
- 668 36. Papasteri, C., A. Sofonea, R. Boldasu, C. Poalelungi, M. I. Tomescu, C. A. D. Pistol, C. Nedelcea, I.  
669 R. Podina, A. I. Berceanu, R. C. Froemke and I. Carcea (2020). "Social feedback during sensorimotor  
670 synchronization changes salivary oxytocin and behavioral states." *Frontiers in Psychology*  
671 **accepted**.
- 672 37. Hale, J. and A. F. Hamilton (2016). "Cognitive mechanisms for responding to mimicry from others."  
673 *Neurosci Biobehav Rev* **63**: 106-123.

- 674 38. Spengler, F. B., D. Scheele, N. Marsh, C. Kofferath, A. Flach, S. Schwarz, B. Stoffel-Wagner, W.  
675 Maier and R. Hurlemann (2017). "Oxytocin facilitates reciprocity in social communication." Soc  
676 Cogn Affect Neurosci **12**(8): 1325-1333.
- 677 39. Paukner A, Suomi SJ, Visalberghi E, Ferrari PF., (2009). Capuchin monkeys display affiliation  
678 towards humans who imitate them. *Science* **14**, 325(5942):880
- 679 40. Bartz, J. A., J. Zaki, N. Bolger and K. N. Ochsner (2011). "Social effects of oxytocin in humans:  
680 context and person matter." Trends Cogn Sci **15**(7): 301-309.
- 681 41. Leng, G. and M. Ludwig (2016). "Intranasal Oxytocin: Myths and Delusions." Biol Psychiatry **79**(3):  
682 243-250.
- 683 42. Jurek, B., and Neumann, I. D. (2018). "The oxytocin receptor: from intracellular signaling to  
684 behavior". Physiol Rev **98**: 1805-1908.
- 685 43. Engert, V., J. Smallwood and T. Singer (2014). "Mind your thoughts: associations between self-  
686 generated thoughts and stress-induced and baseline levels of cortisol and alpha-amylase." Biol  
687 Psychol **103**: 283-291.
- 688 44. Caldwell, H. K. (2018). "Oxytocin and sex differences in behavior." Current Opinion in Behavioral  
689 Sciences **23**: 13-20.
- 690 45. Tomescu, M. I., T. A. Rihs, V. Rochas, M. Hardmeier, J. Britz, G. Allali, P. Fuhr, S. Eliez and C. M.  
691 Michel (2018). "From swing to cane: Sex differences of EEG resting-state temporal patterns during  
692 maturation and aging." Dev Cogn Neurosci **31**: 58-66.
- 693 46. Carcea, I., M. N. Insanally and R. C. Froemke (2017). "Dynamics of auditory cortical activity during  
694 behavioural engagement and auditory perception." Nat Commun **8**: 14412.
- 695 47. Cole, M. W., T. Ito, D. S. Bassett and D. H. Schultz (2016). "Activity flow over resting-state networks  
696 shapes cognitive task activations." Nat Neurosci **19**(12): 1718-1726.
- 697 48. Nishida, K., Y. Morishima, M. Yoshimura, T. Isotani, S. Irisawa, K. Jann, T. Dierks, W. Strik, T.  
698 Kinoshita and T. Koenig (2013). "EEG microstates associated with salience and frontoparietal  
699 networks in frontotemporal dementia, schizophrenia and Alzheimer's disease." Clin Neurophysiol  
700 **124**(6): 1106-1114.
- 701 49. Tomescu, M. I., T. A. Rihs, R. Becker, J. Britz, A. Custo, F. Grouiller, M. Schneider, M. Debbane, S.  
702 Eliez and C. M. Michel (2014). "Deviant dynamics of EEG resting-state pattern in 22q11.2 deletion  
703 syndrome adolescents: A vulnerability marker of schizophrenia?" Schizophr Res **157**(1-3): 175-  
704 181.
- 705 50. Tomescu, M. I., T. A. Rihs, M. Roinishvili, F. I. Karahanoglu, M. Schneider, S. Menghetti, D. Van De  
706 Ville, A. Brand, E. Chkonia, S. Eliez, M. H. Herzog, C. M. Michel and C. Cappe (2015). "Schizophrenia  
707 patients and 22q11.2 deletion syndrome adolescents at risk express the same deviant patterns of  
708 resting-state EEG microstates: A candidate endophenotype of schizophrenia." Schizophr Res Cogn  
709 **2**(3): 159-165
- 710 51. Gschwind, M., M. Hardmeier, D. Van De Ville, M. I. Tomescu, I. K. Penner, Y. Naegelin, P. Fuhr, C.  
711 M. Michel and M. Seeck (2016). "Fluctuations of spontaneous EEG topographies predict disease  
712 state in relapsing-remitting multiple sclerosis." Neuroimage Clin **12**: 466-477.
- 713 52. Damborska, A., M. I. Tomescu, E. Honzirkova, R. Bartecek, J. Horinkova, S. Fedorova, S. Ondrus  
714 and C. M. Michel (2019). "EEG Resting-State Large-Scale Brain Network Dynamics Are Related to  
715 Depressive Symptoms." Front Psychiatry **10**: 548
- 716 53. Jan, R. K., T. A. Rihs, N. Kojovic, H. F. Sperdin, M. Franchini, A. Custo, M. I. Tomescu, C. M. Michel  
717 and M. Schaer (2019). "Neural Processing of Dynamic Animated Social Interactions in Young  
718 Children With Autism Spectrum Disorder: A High-Density Electroencephalography Study." Front  
719 Psychiatry **10**: 582.

- 720 54. da Cruz, J. R., O. Favrod, M. Roinishvili, E. Chkonia, A. Brand, C. Mohr, P. Figueiredo and M. H.  
721 Herzog (2020). "EEG microstates are a candidate endophenotype for schizophrenia." Nat  
722 Commun **11**(1): 3089.
- 723 55. Aron, A., E. N. Aron and D. Smollan (1992). "Inclusion of Other in the Self Scale and the structure  
724 of interpersonal closeness." Journal of Personality and Social Psychology **63**(4): 596-612.
- 725 56. McCrae, R. R., P. T. Costa, Jr. and T. A. Martin (2005). "The NEO-PI-3: a more readable revised NEO  
726 Personality Inventory." J Pers Assess **84**(3): 261-270.
- 727 57. Jung, T. P., S. Makeig, M. Westerfield, J. Townsend, E. Courchesne and T. J. Sejnowski (2000).  
728 "Removal of eye activity artifacts from visual event-related potentials in normal and clinical  
729 subjects." Clin Neurophysiol **111**(10): 1745-1758.
- 730 58. Perrin, F., J. Pernier, O. Bertrand and J. F. Echallier (1989). "Spherical splines for scalp potential  
731 and current density mapping." Electroencephalogr Clin Neurophysiol **72**(2): 184-187.
- 732 59. Pascual-Marqui, R. D., C. M. Michel and D. Lehmann (1995). "Segmentation of brain electrical  
733 activity into microstates: model estimation and validation." IEEE Trans Biomed Eng **42**(7): 658-  
734 665.
- 735 60. Murray, M. M., D. Brunet and C. M. Michel (2008). "Topographic ERP analyses: a step-by-step  
736 tutorial review." Brain Topogr **20**(4): 249-264.
- 737 61. Brunet, D., M. M. Murray and C. M. Michel (2011). "Spatiotemporal analysis of multichannel EEG:  
738 CARTOOL." Comput Intell Neurosci **2011**: 813870.
- 739 62. Khanna, A., A. Pascual-Leone, C. M. Michel and F. Farzan (2015). "Microstates in resting-state EEG:  
740 current status and future directions." Neurosci Biobehav Rev **49**: 105-113.
- 741 63. Lehmann, D., P. L. Faber, S. Galderisi, W. M. Herrmann, T. Kinoshita, M. Koukkou, A. Mucci, R. D.  
742 Pascual-Marqui, N. Saito, J. Wackermann, G. Winterer and T. Koenig (2005). "EEG microstate  
743 duration and syntax in acute, medication-naive, first-episode schizophrenia: a multi-center  
744 study." Psychiatry Res **138**(2): 141-156.
- 745 64. Krishnan, A., L. J. Williams, A. R. McIntosh and H. Abdi (2011). "Partial Least Squares (PLS) methods  
746 for neuroimaging: a tutorial and review." Neuroimage **56**(2): 455-475.
- 747 65. McIntosh, A. R. and B. Misic (2013). "Multivariate statistical analyses for neuroimaging data."  
748 Annu Rev Psychol **64**: 499-525.
- 749 66. Kebets, V., A. J. Holmes, C. Orban, S. Tang, J. Li, N. Sun, R. Kong, R. A. Poldrack and B. T. T. Yeo  
750 (2019). "Somatosensory-Motor Dysconnectivity Spans Multiple Transdiagnostic Dimensions of  
751 Psychopathology." Biol Psychiatry **86**(10): 779-791.

752

753

754

755

756

757

758

759
